# Supplementary material for: Low Pt-content ternary PdCuPt nanodendrites: an efficient electrocatalyst for oxygen reduction reaction
Source: Royal Society of Chemistry journal article supplement (doi:10.1039/c6nr06646a), 2016-12-14
Supplement: c6nr06646a1.pdf [file c6nr06646a1.pdf]

# Low-Pt-Content Ternary PdCuPt Nanodendrites: An Efficient Electrocatalyst for Oxygen Reduction Reaction

Shaofang Fu,<sup>a,†</sup> Chengzhou Zhu,<sup>a,†</sup> Junhua Song,<sup>a</sup> Peina Zhang,<sup>b</sup> Mark H. Engelhard,<sup>c</sup>

Haibing Xia,<sup>b</sup> Dan Du,<sup>a</sup> Yuehe Lin<sup>a,c\*</sup>

<sup>a</sup> The School of Mechanical and Materials Engineering, Washington State University, Pullman, WA 99164, USA.

<sup>b</sup> State Key Laboratory of Crystal Materials, Shandong University, Jinan, P. R. China

<sup>c</sup> Environmental Molecular Sciences Laboratory, Pacific Northwest National laboratory, Richland, WA 99352, USA.

Email: [yuehe.lin@wsu.edu](mailto:yuehe.lin@wsu.edu)

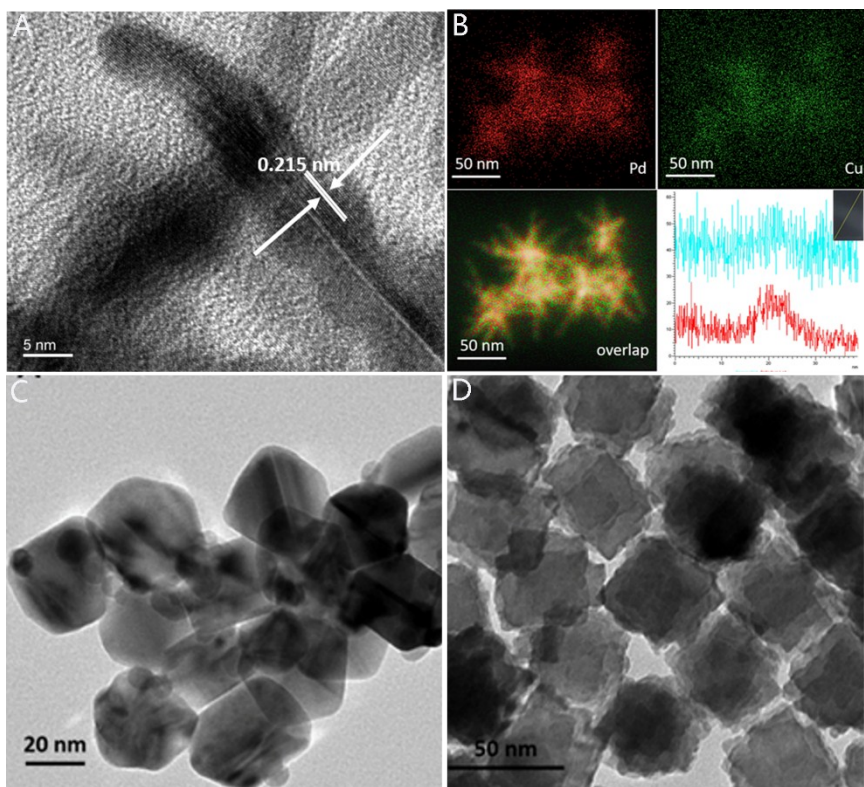

Figure S1. (A) HRTEM image of PdCu NDs. (B) EDS mapping and line scan profile of PdCu NDs. TEM images of Pd (C) and PtPd (D) nanostructures under the typical synthesis condition.

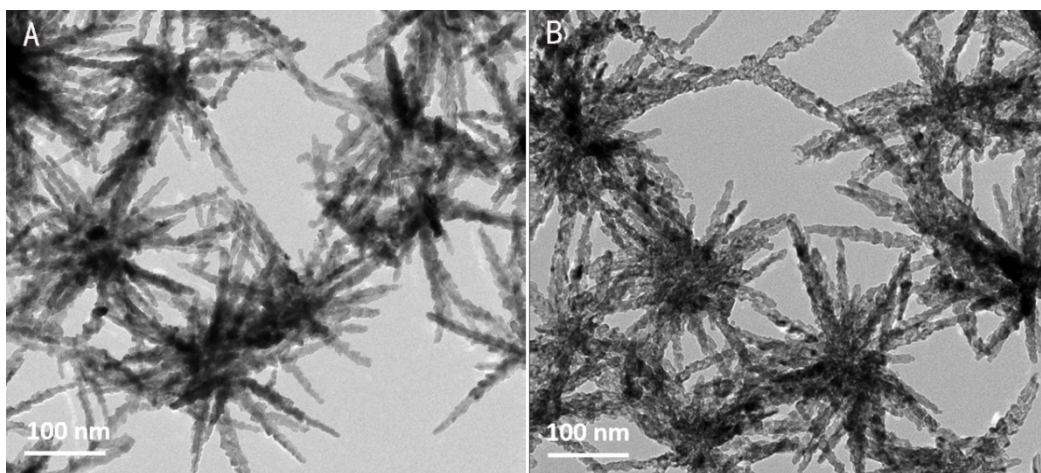

Figure S2. TEM images of Pd<sub>85</sub>Cu<sub>9</sub>Pt<sub>6</sub> (A) and Pd<sub>69</sub>Cu<sub>5</sub>Pt<sub>26</sub> (B) NDs.

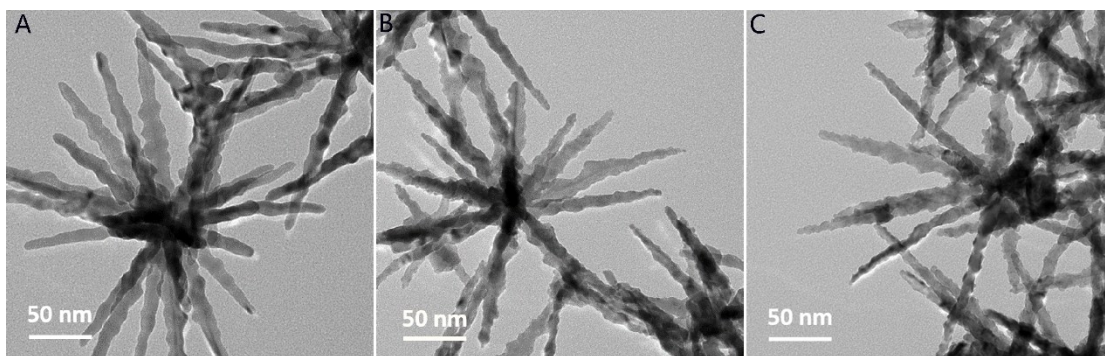

Figure S3. TEM images of PdCuPt NDs obtained at 5 (A), 15 (B), and 30 min (C).

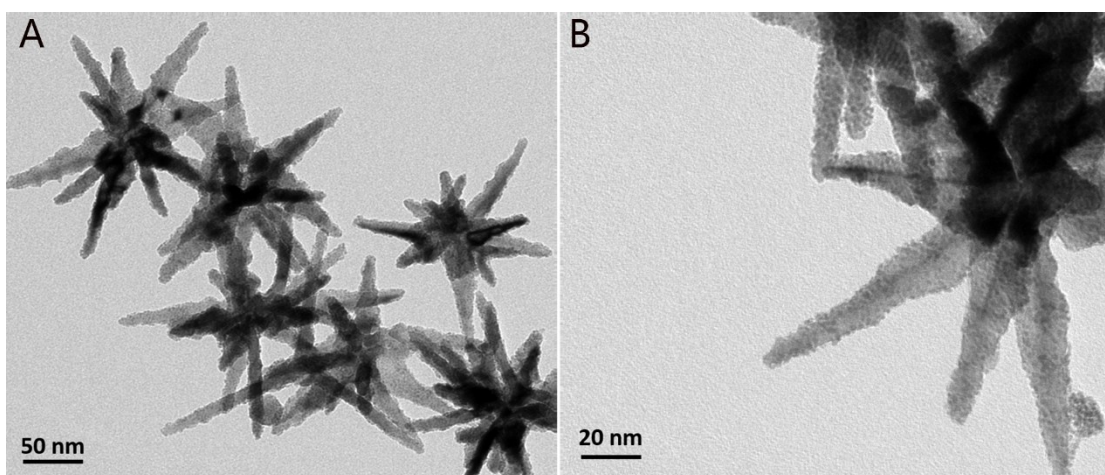

Figure S4. TEM images of PdCuPt NDs synthesized under the typical condition without the addition of KBr.

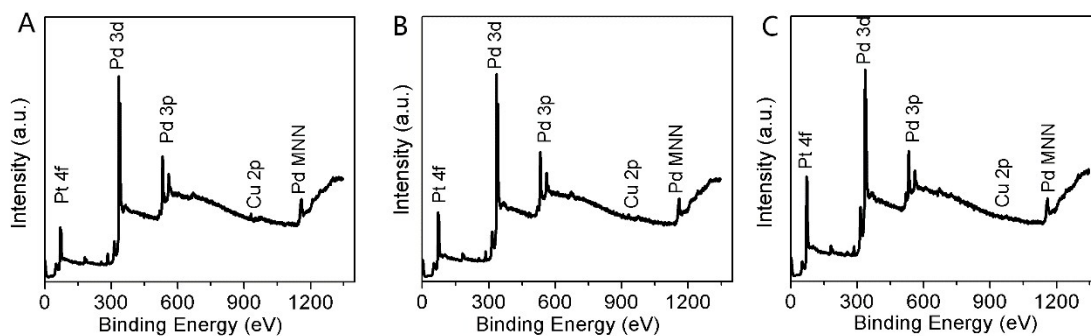

Figure S5. XPS spectra of PdCuPt NDs

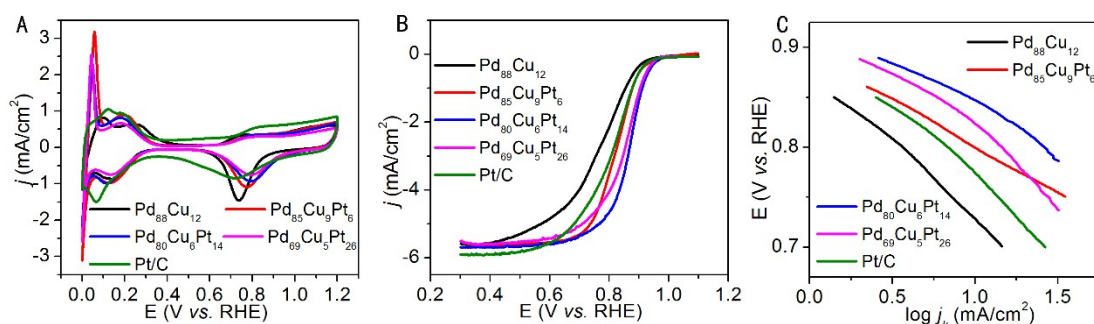

Figure S6. Electrocatalytic properties of PdCu, PdCuPt NDs and commercial Pt/C

catalysts. (A) CV curves of the catalysts in N<sub>2</sub>-saturated 0.1 M HClO<sub>4</sub> solution at a sweep rate of 50 mV/s. ORR polarization curves (B) and corresponding Tafel plots (C) of the catalysts in O<sub>2</sub>-saturated 0.1 M HClO<sub>4</sub> solution at a sweep rate of 10 mV/s and a rotation rate of 1600 rpm.

Table S1. Electrochemical ORR parameters of PdCu, PdCuPt NDs and commercial Pt/C catalyst.

|                                                   | ECSA<br>(m <sup>2</sup> /g) | Onset<br>potential (V) | Half-wave<br>potential (V) | MA @0.9 V<br>(A/mg <sub>Pt</sub> ) | MA @0.9 V<br>(A/mg <sub>Pt+Pd</sub> ) | SA @0.9 V<br>(mA/cm <sup>2</sup> ) | Tafel slope<br>(mV/decade) |
|---------------------------------------------------|-----------------------------|------------------------|----------------------------|------------------------------------|---------------------------------------|------------------------------------|----------------------------|
| Pd <sub>88</sub> Cu <sub>12</sub>                 | NA                          | 0.902                  | 0.767                      | NA                                 | 0.02                                  | NA                                 | 111                        |
| Pd <sub>85</sub> Cu <sub>9</sub> Pt <sub>6</sub>  | 89                          | 0.917                  | 0.819                      | 0.46                               | 0.03                                  | 0.033                              | 86                         |
| Pd <sub>80</sub> Cu <sub>6</sub> Pt <sub>14</sub> | 84                          | 0.933                  | 0.864                      | 0.54                               | 0.08                                  | 0.095                              | 66                         |
| Pd <sub>69</sub> Cu <sub>5</sub> Pt <sub>26</sub> | 68                          | 0.931                  | 0.849                      | 0.26                               | 0.07                                  | 0.1                                | 82                         |
| Pt/C                                              | 83                          | 0.908                  | 0.809                      | 0.03                               | 0.03                                  | 0.036                              | 98                         |

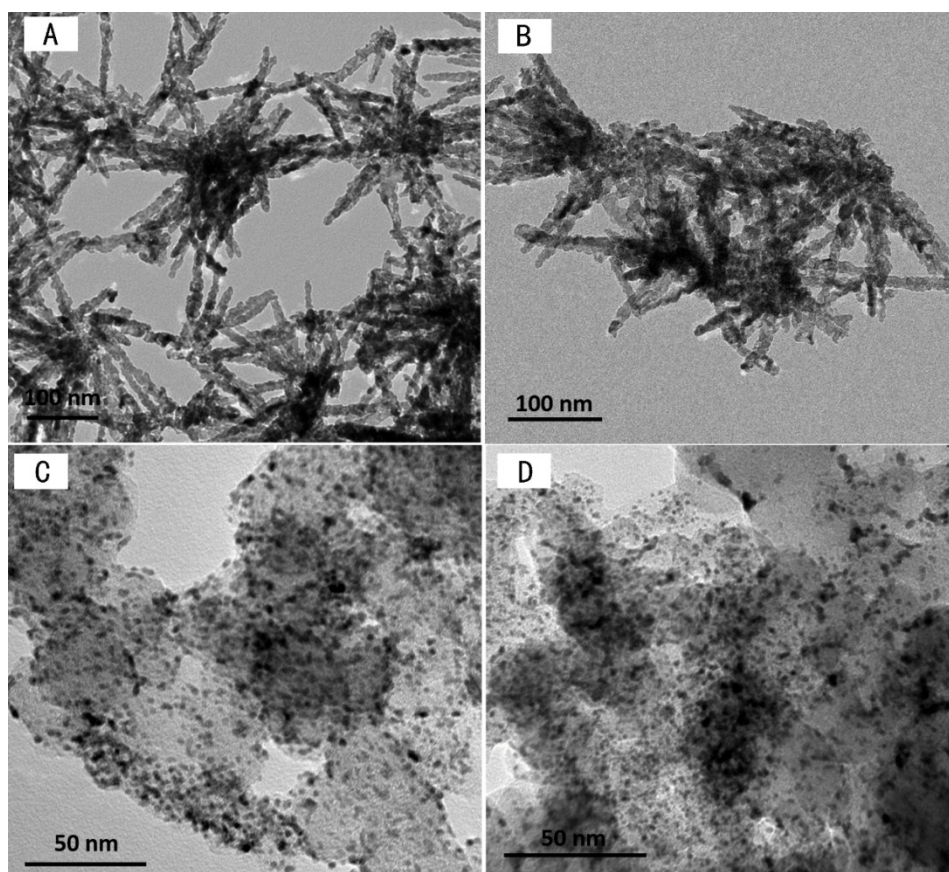

Figure S7. TEM images of Pd<sub>80</sub>Cu<sub>6</sub>Pt<sub>14</sub> before (A) and after (B) durability tests. TEM images of commercial Pt/C before (C) and after (D) durability tests.
